# Supplementary material
Source: MDPI journal article supplement (https://www.mdpi.com/2073-4395/13/2/576)
Supplement: s1 [file s1]

**Table S1.** Journal title, ISO abbreviation and publisher appearing in the manuscript.

| Journal title                                                         | ISO abbreviation                          | Publisher                    |
|-----------------------------------------------------------------------|-------------------------------------------|------------------------------|
| Acta astronautica                                                     | <i>Acta astronaut.</i>                    | Pergamon (Elsevier)          |
| Agricultural systems                                                  | <i>Agric. Syst.</i>                       | Elsevier                     |
| Agriculture                                                           | <i>Agriculture-Basel</i>                  | MDPI                         |
| Agronomy                                                              | <i>Agronomy-Basel</i>                     | MDPI                         |
| Agronomy Journal                                                      | <i>Agron. J.</i>                          | Wiley                        |
| Biosystems Engineering                                                | <i>Biosyst. Eng.</i>                      | Elsevier                     |
| Canadian journal of remote sensing                                    | <i>Can. J. Remote Sens.</i>               | Taylor & Francis             |
| Computers and electronics in agriculture                              | <i>Comput. Electron. Agric.</i>           | Elsevier                     |
| Current science                                                       | <i>Curr. Sci.</i>                         | Indian Academy of Sciences   |
| Environmental Processes                                               | <i>Environ. Process.</i>                  | Springer                     |
| European journal of agronomy                                          | <i>Eur. J. Agron.</i>                     | Elsevier                     |
| European journal of remote sensing                                    | <i>Eur. J. Remote Sens.</i>               | Taylor & Francis             |
| Field crops research                                                  | <i>Field Crop. Res.</i>                   | Elsevier                     |
| Geoderma                                                              | <i>Geoderma</i>                           | Elsevier                     |
| IEEE Geoscience and remote sensing letters                            | <i>IEEE Geosci. Remote Sens. Lett.</i>    | IEEE                         |
| IEEE Transactions on geoscience and remote sensing                    | <i>IEEE Trans. Geosci. Remote Sensing</i> | IEEE                         |
| International journal of applied earth observation and geoinformation | <i>Int. J. Appl. Earth Obs. Geoinf.</i>   | Elsevier                     |
| International journal of remote sensing                               | <i>Int. J. Remote Sens.</i>               | Taylor & Francis             |
| Journal of Integrative Agriculture                                    | <i>J. Integr. Agric.</i>                  | Elsevier                     |
| Nature                                                                | <i>Nature</i>                             | Springer Nature              |
| PLoS one                                                              | <i>PLoS One</i>                           | Public Library of Science    |
| Precision agriculture                                                 | <i>Precis. Agric.</i>                     | Springer                     |
| Proceedings of the National Academy of Sciences                       | <i>PNAS</i>                               | National Academy of Sciences |
| Remote sensing letters                                                | <i>Remote Sens. Lett.</i>                 | Taylor & Francis             |
| Scientific Data                                                       | <i>Sci. Data</i>                          | Springer Nature              |
| Scientific reports                                                    | <i>Sci Rep</i>                            | Nature Portfolio (Springer)  |
| Weed Research                                                         | <i>Weed Sci.</i>                          | Wiley                        |
